1 **8 Å structure of the cytoplasmic ring of the *Xenopus laevis***  
2 **nuclear pore complex solved by cryo-EM and AI**

3 Linhua Tai<sup>1, 4, #</sup>, Yun Zhu<sup>1, #</sup>, He Ren<sup>2, #</sup>, Xiaojun Huang<sup>1, 3</sup>, Chuanmao Zhang<sup>2, \*</sup> and Fei  
4 Sun<sup>1, 3, 4, 5, \*</sup>

5  
6 <sup>1</sup> National Key Laboratory of Biomacromolecules, CAS Center for Excellence in  
7 Biomacromolecules, Institute of Biophysics, Chinese Academy of Sciences, Beijing  
8 100101, China.

9 <sup>2</sup>The Ministry of Education Key Laboratory of Cell Proliferation and Differentiation and the  
10 State Key Laboratory of Membrane Biology, College of Life Sciences, Peking University,  
11 Beijing 100871, China.

12 <sup>3</sup> Center for Biological Imaging, Institute of Biophysics, Chinese Academy of Sciences,  
13 Beijing 100101, China.

14 <sup>4</sup> University of Chinese Academy of Sciences, Beijing 100049, China.

15 <sup>5</sup> Bioland Laboratory (Guangzhou Regenerative Medicine and Health Guangdong  
16 Laboratory), Guangzhou, Guangdong 510005, China.

17

18 **Running head:** Cytoplasmic ring structure of *X. laevis* NPC

19 #These authors contributed equally to this work.

20 \*Correspondence: Fei Sun ([feisun@ibp.ac.cn](mailto:feisun@ibp.ac.cn)) or Chuanmao Zhang  
21 ([zhangcm@pku.edu.cn](mailto:zhangcm@pku.edu.cn)).

22

23

24 **ABSTRACT**

25 As one of the largest protein complexes in eukaryotes, the nuclear pore  
26 complex (NPC) forms a conduit regulating nucleocytoplasmic transport. Here,  
27 we determined 8 Å resolution cryo-electron microscopic (cryo-EM) structure of  
28 the cytoplasmic ring (CR) from the *Xenopus laevis* NPC. With the aid of  
29 AlphaFold2, we managed to build a most comprehensive and accurate  
30 pseudoatomic model of the CR to date, including the Y complexes and flanking  
31 components of Nup358, Nup214 complexes, Nup205 and Nup93. Comparing  
32 with previously reported CR model, the Y complex structure in our model  
33 exhibits much tighter interactions in the hub region mediated by  $\alpha$ -solenoid  
34 domain in Nup160 C-terminus. Five copies of Nup358 are identified in each CR  
35 subunit to provide rich interactions with other Nups in stem regions of Y  
36 complexes. Two copies of Nup214 complexes lay in a parallel pattern and  
37 attach to the short arm region of Y complexes towards the central channel of  
38 NPC. Besides, the structural details of two copies of Nup205 on the side of the  
39 short arm region and one copy of Nup93 on the stem region of Y complexes in  
40 each CR subunit are also revealed. These in-depth novel structural features  
41 represent a great advance in understanding the assembly of NPCs.

42

43

44

45

## 46 Introduction

47 In eukaryotes, the double layer inner nucleus membrane (INM) and outer  
48 nucleus membrane (ONM) form the nuclear envelope (NE) to enclose nucleus  
49 to store genetic materials <sup>1,2</sup>. To make the bidirectional transport possible  
50 between cytoplasm and nucleoplasm, nuclear pore complex (NPC) forms a  
51 conduit regulating nucleocytoplasmic transport. NPC is one of the biggest  
52 protein complexes throughout eukaryotes <sup>1,3,4</sup>, and its building blocks are  
53 named as Nucleoporins (Nups). In fungi, NPC consists of ~500 Nups with  
54 molecular weight of ~66 MDa, while in higher eukaryotes, NPC consists of  
55 ~1000 Nups with molecular weight of ~120 MDa. These Nups arrange into a  
56 roughly eight-fold symmetrical assembly around a central channel  
57 perpendicular to the NE where the transportation occurs <sup>5-9</sup>. NPC can be divided  
58 into four scaffolding rings and several attachments, including cytoplasmic ring  
59 (CR), inner ring (IR), nuclear ring (NR), luminal ring (LR), cytoplasmic filament,  
60 nuclear basket, and permeability barrier formed by phenylalanine-glycine (FG)  
61 rich Nups <sup>10-13</sup>

62

63 Detailed structural information is necessary for mechanistic understanding of  
64 NPC functions, but it has long been hindered by the enormous size and high  
65 dynamicity of NPC. Cryo-electron tomography (cryo-ET) along with  
66 subtomogram averaging (STA) has been applied to reach ~2 nm resolution of  
67 NPC structures from multiple species, including *Homo sapiens* (*H. sapiens*),  
68 *Xenopus laevis* (*X. laevis*), *Chlamydomonas reinhardtii* (*C. reinhardtii*),  
69 *Schizosaccharomyces pombe* (*S. pombe*), and *Saccharomyces cerevisiae* (*S.*  
70 *cerevisiae*) <sup>13-19</sup>. Based on these studies, the basic architectures of CR, IR and  
71 NR have been solved by rigidly docking of crystal structures of several Nups  
72 <sup>1,20</sup>, such as the model reported by Lin et al. in 2016 (aliased as 2016-model)

73 <sup>20</sup>. In these scaffold rings, eight asymmetric units (or named as **subunits**) lay in  
74 a head to tail fashion to form the backbones. In outer rings (NR and CR), the  
75 backbones in each subunit are formed by one or two Y-shaped complexes, also  
76 known as Nup84 complex in fungi or Nup107-160 complex in vertebrates <sup>13,21-</sup>  
77 <sup>24</sup>. In Y complex of vertebrates, Nup85, Nup43 and Seh1 form the short arm  
78 region, Nup160 and Nup37 form the long arm region, Sec13, Nup96, Nup107  
79 and Nup133 form the stem region <sup>14</sup>.

80

81 As a major member of NPC scaffold rings, the CR is essential for building and  
82 maintaining NPC structures. It provides docking sites for cytoplasmic filaments  
83 to regulate importin  $\alpha/\beta$  dependent nucleocytoplasmic transport and messenger  
84 ribonucleoprotein (**mRNP**) exporting <sup>25,26</sup>. Thus, in addition to the Y complex  
85 scaffold, CR has several unique components like Nup358 complex and Nup214  
86 complex. However, the structural characteristics of these important CR  
87 components remain elusive, including the exact copy numbers, locations, and  
88 interactions. In 2020, cryo-electron microscopic (**cryo-EM**) single particle  
89 analysis (**SPA**) was applied to reveal the detailed structure of *X. laevis* NPC CR,  
90 reaching a highest resolution of 5.5 Å for most rigid part of CR (aliased as **2020-**  
91 **model**) <sup>27</sup>. However, due to the preferred orientations in sample preparation and  
92 lack of an accurate starting model, it's still very hard to obtain a reliable  
93 pseudoatomic model of the CR.

94

95 Most recently, we developed an improved cryo-EM SPA method to solve the  
96 problem of preferred orientations, and determined the significantly improved  
97 structure of the NR of the *X. laevis* NPC with an isotropic resolution around 8 Å  
98 <sup>28</sup>. Meanwhile, with the aid of the highly accurate protein structure prediction  
99 tool AlphaFold2 <sup>29</sup>, we built the most complete pseudoatomic model of the NR

100 and revealed multiple previously uncharacterized structural features. Here,  
101 using similar approaches, we determined the CR structure of the *X. laevis* NPC  
102 with an isotropic subnanometer resolution, and built the most complete and  
103 accurate pseudoatomic model of the CR to date. According to this significantly  
104 improved model, we identified multiple structural features in CR subunit,  
105 including tight interactions in the Y complex hub mediated by Nup160, five  
106 copies of Nup358 warped around the stem region, two copies of Nup214  
107 complexes attached to the short arm region, two copies of Nup205 on the side  
108 of the arm region, single copy of Nup93 bridging the stem region. Our results  
109 improve the understanding of detailed assembly and functions of NPC.

110

## 111 **Results**

### 112 **Structure determination of CR subunit of *X. laevis* NPC**

113 Since NPCs are naturally perpendicular to the NE, imaging NPCs directly on  
114 native NE will bring significant problem of preferred orientations in the map  
115 reconstructions. As reported previously<sup>28</sup>, we combined the strategy of imaging  
116 NPCs on tilted NE (tilt view) and on the edge of folded back NE (side view) to  
117 solve this problem ([Extended Data Fig. 1](#)). Using this approach, the  
118 reconstruction in core region of CR subunit reaches 8 Å isotropic resolution,  
119 with highest local resolution of 7.2 Å ([Extended Data Fig. 2](#)). Meanwhile, the  
120 whole CR subunit and CR Nup358 region reached the isotropic resolution of  
121 8.7 Å and 8.9 Å, respectively ([Extended Data Fig. 2](#)). By investigate the  
122 directional resolution using three-dimensional Fourier shell correlation (3D-FSC)  
123 estimates<sup>30</sup>, the sphericity values of these reconstructions range from 0.91 to  
124 0.95, suggesting no significant anisotropy in the cryo-EM maps ([Extended Data](#)  
125 [Fig. 2](#)).

126

127 Then we utilized AlphaFold2 to predict the full-length model for each Nup in CR  
128 as the starting model for refinement ([Extended Data Fig. 3, 4](#))<sup>31</sup>. Based on the  
129 improved density map, sequential molecular dynamics flexible fitting (MDFF)  
130 and manual refinement were both used to build a total of 15 different Nups, 32  
131 components into each CR subunit ([Fig. 1A-B, Extended Data Fig. 3](#)). We  
132 noticed that the refined model of each CR Nup according to the local density is  
133 basically similar with starting model ([Extended Data Fig. 4](#)), proving the high  
134 accuracy of the initial models generated by AlphaFold2. As the most  
135 comprehensive and accurate pseudoatomic model of the CR to date, there are  
136 22372 residues in each CR subunit in our model, which extends 102%  
137 comparing with 2016-model (11064 residues) and 52.4% comparing with 2020-  
138 model (14683 residues)<sup>20,27</sup>. Since the structures of  $\beta$ -propeller domains of CR  
139 Nups have been well studied in previous studies<sup>1,8,22,32,33</sup>, these extensions are  
140 mainly located on  $\alpha$ -solenoid domains of Y complex Nups and Nup93, Nup205,  
141 Nup358 and Nup214 complex, which will be discussed below ([Fig. 1B-C](#)).

142

### 143 **Enhanced interactions of Y complexes in the hub region**

144 Most recently, we reported the NR structure of *X. laevis* NPC, in which a total  
145 of 21 components and 15622 residues were built in each NR subunit<sup>28</sup>. After  
146 comparing the more accurate models of NR and CR subunits, we found that  
147 besides the flanking components unique for each ring, like ELYS for NR and  
148 Nup358 or Nup214 complex for CR, their Y complex scaffold shares very similar  
149 architecture. The root-mean-square error (RMSD) value for double Y  
150 complexes in NR and CR is 4.6 Å ([Fig. 1D](#)), and no large shifts are found for all  
151 the domains in Y complex Nups. For individual Y complex, the RMSD values  
152 for inner Y and outer Y in CR, the inner Y in NR and CR, the outer Y in NR and  
153 CR are 5.6 Å, 4.8 Å and 3.8 Å, respectively ([Extended Data Fig. 5](#)). The only  
154 significant differences are found in comparison of CR inner and outer Y

155 complexes, while the inner Nup133 has a shift of ~8 nm at the C-terminal  
156 domain (CTD). This shift should be related to the shorter circumference for eight  
157 inner Y complexes than outer Y complexes when forming a concentric ring of  
158 CR. The consistency of the scaffold structure in NR and CR agrees well with  
159 previous report <sup>13,14,20,34</sup>.

160

161 In previous report, we have identified several novel interactions according to  
162 the most complete model of Y complex in NR <sup>28</sup>. In this study, we also identified  
163 these interaction features in Y complex of CR. Briefly, in the Y complex hub  
164 region, the CTD of Nup160 (Q1045-I1432) recruits Seh1, Sec13, Nup85 and  
165 Nup96 to form an interaction network for stabilizing Y complex (Fig. 1E). It  
166 suggested that Nup160 plays a central role in the assembly and stabilizing Y  
167 complexes in both NR and CR. Moreover, it is worth noting that the local density  
168 map for N-terminal domain (NTD) of Nup160 in CR exhibits lower local  
169 resolution comparing to that in NR (Extended Data Fig. 2) <sup>28</sup>, indicating the  
170 larger dynamic for the long arm region of Y complex in CR. This kind of dynamic  
171 of CR may be due to two reasons. On the one hand, in certain conditions like  
172 energy depletion, constriction may happen on the CR region of NPC <sup>19</sup>. On the  
173 other hand, CR has only 32  $\beta$ -propeller domains (16 from Nup160 and 16 from  
174 Nup133) anchored onto the NE, while NR have 8 or 16 more (from ELYS) to  
175 enhance the stability of Y complexes onto the membrane and increase the local  
176 stability of Nup160 NTD <sup>14</sup>.

177

### 178 **Five copies of Nup358 reside in each CR subunit**

179 Nup358, as the largest Nup in vertebrates, plays an essential role in biological  
180 functions of NPC through its multiple domains. It was known that Nup358  
181 contains an  $\alpha$  helical region in the NTD (Fig. 2A), followed by multiple domains

182 separated by unstructured regions, including Ran-binding domain, Zinc finger  
183 domain, E3 ligase domain and Cyclophilin domain <sup>1,27,35-37</sup>. Recent studies  
184 identified that the density corresponding to Nup358 looks like several clamps  
185 near the stems of Y complexes <sup>14,35</sup>, and the copy number of Nup358 in each  
186 CR subunit may be 2 or 4 <sup>27,37</sup>. By using AlphaFold2, we predicted the structure  
187 of Nup358 NTD, then found that this clamp-shaped structure could fit well in the  
188 local density of previously assigned location for Nup358 ([Extended Data Fig.  
189 3I](#)). Strikingly, a total of 5 copies of Nup358 NTD could be well modeled into this  
190 region, suggesting that there should be at least 5 Nup358 proteins stably bound  
191 to the stem region of Y complexes in each CR subunit ([Fig. 2B-C](#)). The  
192 identification of 5 copies of Nup358 in each CR subunit could be also confirmed  
193 by fitting our CR model into the reported NPC structure from HeLa cell, in which  
194 the density for all the five Nup358 proteins is obvious ([Extended Data Fig. 6](#)) <sup>14</sup>.

195

196 To distinguish each Nup358, we named them as inner-left, inner-right, outer-  
197 left, outer-right and top one according to their spatial locations, assuming the  
198 observer stands inside the nuclear channel ([Fig. 2C](#)). The two outer Nup358  
199 proteins located farther from the nuclear channel than the inner ones, while the  
200 top Nup358 situated on top of the other four copies. These Nup358 proteins  
201 have rich contacts with surrounding CR Nups in different ways. Take inner-right  
202 Nup358 as an example, its  $\alpha 1$  to  $\alpha 6$  helices (M1 to I109) interact with  $\alpha 4$  to  $\alpha 12$   
203 helices (P400 to Q597) of outer Nup96,  $\alpha 16$  to  $\alpha 20$  helices (D274 to N393)  
204 interact with  $\alpha 10$  to  $\alpha 11$  helices (D361 to E406) of Nup93,  $\alpha 24$  to  $\alpha 29$  helices  
205 (P476 to K662) interacts with  $\alpha 7$  to  $\alpha 12$  helices (D252 to G361) of outer Nup107  
206 ([Fig. 2D](#)). The other four Nup358 have similar rich interactions ([Fig. 2D](#)). Briefly,  
207 outer-right Nup358 bind to outer Nup107 and inner/outer Nup96; inner-left  
208 Nup358 bind to Sec13, inner Nup96 and Nup93; outer-left Nup358 bind to inner  
209 Nup107, outer Nup133 and Nup93; top Nup358 binds to outer Nup107, inner-



210 left Nup358 and outer-right Nup358. On the whole, the top Nup358 seems to  
211 act as a lid to cover the rest Nup358 proteins, and the later ones form direct  
212 and extensive interactions with inner and outer Y complex to stabilize the stem  
213 region. Moreover, the anchoring of these Nup358 NTDs onto CR will facilitate  
214 the other domains of Nup358 or other Nup358 related proteins to perform the  
215 proper biological functions at the right locations.

216

### 217 **Two Nup214 complexes lay in parallel in each CR subunit**

218 As another major component of cytoplasmic filament, Nup214 complex is  
219 believed to form a mRNP export platform on the cytoplasmic face of NPC and  
220 coordinate the mRNP remodeling process to ensure the unidirectional  
221 transportation process<sup>38,39</sup>. However, the structural details of Nup214 complex  
222 remains elusive to date, including the exact copy number, its relative locations  
223 to Y complex and the pseudoatomic model<sup>27</sup>. The Nup214 complex is regarded  
224 to have at least three major components: Nup214, Nup88 and Nup62 in  
225 vertebrates (Fig. 3A), or Nup159, Nup82 and Nsp1 in fungi. It was reported that  
226 Nup159 complex may form a P-shaped homodimer configuration<sup>17,38,39</sup>, but  
227 this kind of structure was not found in the CR structure of *X. laevis*<sup>27</sup>.

228

229 Using AlphaFold2, we predicted the complex structure of Nup214, Nup88 and  
230 Nup62, and found that these three Nups could form a rake-shaped  
231 conformation (Extended Data Fig. 3J), including a  $\beta$ -propeller domain as the  
232 handle, a helix bundle as the body and two helix bundles as the head. Then we  
233 fitted this rake-shaped structure into the flanking density above the short arms  
234 of two Y complexes and found that there should be two copies of Nup214  
235 complexes in each CR subunit (Fig. 3B-C). To distinguish these two complexes,  
236 we named them as left one and right one according to their spatial locations,

237 assuming the observer stands inside the nuclear channel (Fig. 3D). In the left  
238 Nup214 complex, the rake handle is made up of  $\beta$ -propeller domain of Nup88,  
239 while the unusually long rake body is made up of three helices bundle (3HB)  
240 from Nup214, Nup88 and Nup62, named as 3HB-1. For the rake head, there  
241 are two 3HB structures, 3HB-2 and 3HB-3, while every helix in the 3HBs comes  
242 from different Nups. The right Nup214 complex has basically the same  
243 conformation as the left one, except for the missing 3HB-3 domain (Fig. 3E).

244

245 With this much improved model of those two Nup214 complexes in CR subunit,  
246 we found several important interaction features. For left Nup214 complex, the  
247  $\beta$ -propeller of Nup88 and 3HB-1 domain binds to the  $\alpha$ 7 to  $\alpha$ 16 helices (G205  
248 to S367) of inner Nup85. Then 3HB-2 and 3HB-3 make close contact with  $\alpha$ 14  
249 to  $\alpha$ 15 helices (P315 to F353) of outer Nup85, and also  $\alpha$ 71 to  $\alpha$ 76 helices  
250 (V1586 to G1722) of outer Nup205 (Fig. 3F). For right Nup214 complex, the  $\beta$ -  
251 propeller of Nup88 binds to the left Nup214 complex, and its 3HB-1 and 3HB-2  
252 domains connects with  $\alpha$ 75 to  $\alpha$ 85 helices (A1683 to G1971) of outer Nup205,  
253  $\alpha$ 9 to  $\alpha$ 10 helices (Y288 to P325) of inner Nup107 in adjacent CR subunit,  $\alpha$ 8  
254 to  $\alpha$ 9 helices (Q476 to Q528) of inner Nup96 in adjacent CR subunit (Fig. 3F).  
255 It seems that the two Nup214 complexes help to stabilize the two short arm  
256 regions of Y complexes in CR subunit and contribute to the head-to-tail fashion  
257 of adjacent CR subunits. Moreover, the NTDs of both left and right Nup214  
258 complexes point to the nuclear channel, allowing for the correct formation of  
259 mRNP export platform to coordinate the proper mRNP remodeling process at  
260 cytoplasmic end of nuclear channel<sup>38,40-42</sup>.

261

## 262 **Inner and outer Nup205 play different roles in CR**

263 For the question mark shaped density attached to the Y complex arms in CR,

264 previous studies speculated that it might be Nup205 or Nup188<sup>14,20,34</sup>. Recently,  
265 by taking a closer view with higher resolution structure of *X. laevis* NPC, the  
266 densities were attributed to Nup205 in both CR and NR<sup>27,28</sup>. Here, according  
267 to the isotropic density map of CR subunit and AlphaFold2 predictions, we  
268 modeled full-length Nup205 structure toward the question mark shaped  
269 densities attached to both inner and outer Y complexes, named as inner and  
270 outer Nup205 (Fig. 4A-D). As control, we also tried the modeling of Nup188  
271 according to the same local density. Similar as our previous report for NR<sup>28</sup>,  
272 the structure of Nup205 fits both inner and outer densities much better than  
273 Nup188 (Fig. 4E). The most obvious difference is the tower helix in the middle  
274 domain of Nup205, which is missing in Nup188.

275

276 According to the improved model of inner and outer Nup205, we found that they  
277 have quite different interaction features with surrounding Nups. For inner  
278 Nup205, its NTD ( $\alpha$ 14 to  $\alpha$ 31 helices) contacts with inner Nup160 ( $\alpha$ 41 to  $\alpha$ 42  
279 helices), while its tower helix region ( $\alpha$ 57 to  $\alpha$ 58 helices) interacts with inner  
280 Nup85, inner Seh1 and inner Nup160 (Fig. 4F). For outer Nup205, its NTD  
281 connects to inner Nup43 and outer Nup160, the tower helix region binds to  
282 outer Nup85, outer Seh1 and outer Nup160, the CTD interact with Nup107 of  
283 adjacent CR subunit (Fig. 4F). It showed that inner and outer Nup205 help to  
284 stabilize the two Y complexes formation and head-to-tail fashion in CR.

285

### 286 **Nup93 connects Y complex stems in CR subunit**

287 Recently, we revealed that in NR subunit of *X. laevis* NPC, Nup93 acts as a  
288 bridge to connect two Y complexes in the stem (Fig. 5A)<sup>28</sup>. But the  
289 corresponding location in CR subunit has always been regarded as the density  
290 for Nup358, so whether there is a similar Nup93 bridge in CR as is still unclear

291 to date. According to the improved cryo-EM map of CR subunit, we found that  
292 when the density corresponding to the five copies of Nup358 is removed from  
293 CR subunit, an unassigned density like 'bridge domain' emerges between two  
294 Y complex stems (Fig. 5B-D). Using AlphaFold2's prediction as the starting  
295 reference, we modelled 31  $\alpha$ -helices of Nup93 into this local density (Extended  
296 Data Fig. 3H). Besides its interactions with the five Nup358 proteins as shown  
297 above, it also connects multiple Y complex Nups. In Nup93 NTD, its  $\alpha$ 1 to  $\alpha$ 17  
298 helices (P173 to P542) connects to inner Sec13 and inner Nup96's  $\alpha$ 13 to  $\alpha$ 15  
299 helices (S595 to G669). In its CTD, the  $\alpha$ 23 to  $\alpha$ 31 helices (P636 to N820)  
300 connects to regions near outer Nup107's finger helix  $\alpha$ 28 to  $\alpha$ 35 (L621 to Q861)  
301 (Fig. 5D). Therefore, this  $\alpha$ -solenoid domain of Nup93 CR participated in the  
302 formation of two Y complexes assembly through its interaction with both Y  
303 complexes' stems in CR.

304

305 When comparing the Nup93 models from NR and CR, we found that the CR  
306 Nup93 have 5 helices missing in the NTD (Fig. 5E), so it seems shorter than  
307 NR Nup93. In the superposition of these two models, their main bodies share  
308 high structural similarity with a RMSD value of 2.8 Å (Fig. 5E). The location for  
309 the missing helices of Nup93 NTD in CR is fully occupied by outer-right Nup358.  
310 Therefore, it might be possible that Nup358 binds to Y complex more tightly  
311 than Nup93 NTD and occupies its interface, then the density corresponding to  
312 Nup93 NTD is missing in CR subunit (Fig. 5E).

313

## 314 Discussion

315 For a long time, there are two major obstacles in solving the detailed structure  
316 of NPC using SPA method. One is the anisotropic resolution caused by  
317 preferred orientation problem, the other is lack of accurate full-length structure

318 of all Nups in NPC. Here, we combined “side-view” particles and “tilt-view”  
319 particles to overcome the insufficient Fourier space sampling problem and used  
320 AlphaFold2 to predict all Nups’ structures. Based on the isotropic reconstruction  
321 map ([Extended Data Fig. 2, 7](#)) and the highly accurate predicted models  
322 ([Extended Data Fig. 4](#)), we managed to build a most comprehensive and  
323 accurate pseudoatomic model of the NPC CR to date. The multiple novel  
324 structural features in this model represent a great advance in understanding the  
325 assembly of NPCs.

326

327 The localization of Nup358 onto both stems of Y complexes was initially  
328 established by knockdown experiments of NPC in Hela cell <sup>14</sup>. Then multiple  
329 studies proved that Nup358 is vital for double Y complexes arrangement in CR  
330 subunit, since those species lacking Nup358 has only one Y complex left in  
331 each CR subunit <sup>14,16</sup>. For the first time, we found that there should be at least  
332 five copies of Nup358 warped around the stem regions of Y complexes in each  
333 CR subunit, and each Nup358 forms extensive but different interactions with  
334 surrounding Nups. This result agrees well with previous reports for the  
335 importance of Nup358. It’s not easy to understand why NPC needs so many  
336 copies of Nup358 in the CR region. One possible reason may be related to the  
337 large cytoplasmic filament attached to CR. Its high dynamic requires the stable  
338 connection to the CR base, so it needs multiple copies of Nup358 proteins for  
339 itself to be firmly anchored on the CR.

340

341 The exportation of mRNAs from nucleoplasm to cytoplasm relies on the correct  
342 modeling and remodeling of mRNPs, while remodeling of mRNPs on  
343 cytoplasmic side of NPC requires participation of Gle1, Nup42, Nup214 and  
344 DEAD-box helicase <sup>41,43</sup>. The mRNP remodeling platform was proposed to

345 project from cytoplasmic ring onto the nuclear channel to ensure the efficient  
346 mRNP remodeling process. Here, we found that there are two Nup214  
347 complexes in each CR subunit of *X. laevis* NPC, both pointing to the nuclear  
348 channel to facilitate correct formation of mRNP export platform. However, in  
349 yeast, the bases of this mRNP remodeling platform were reported to be a  
350 Nup82 holo-complex or a P shaped architecture<sup>17,38</sup>. The structural difference  
351 of the Nup214 complex in different species may be related to the different copy  
352 number of Y complexes in CR. In yeast, the NPC has only one Y complex in  
353 each CR subunit, so it cannot support the rake-shaped structure of Nup214  
354 (Nup159) complex that found in this study, since parallel formation of Nup214  
355 complexes requires the connection to both inner and outer Nup85  
356 simultaneously. Then in yeast, Nup159 needs to form a different confirmation,  
357 such as the holo-complex dimer, to anchor onto the CR region. Moreover, the  
358 two copies of Nup214 complexes in parallel seem to provide a much denser  
359 arrangement of FG-repeat domains inside the nuclear channel, which may lead  
360 to a more efficient mRNP exporting process in vertebrates than yeast.

361

362 According to our much improved models of CR in this study and NR in previous  
363 report<sup>28</sup>, there are 2 copies of Nup205 in CR subunit and 1 copies in NR subunit.  
364 In the reported low-resolution model of IR, there should be 4 Nup188 or Nup205  
365 in each IR subunit<sup>20,34</sup>. Meanwhile, according to stoichiometry data for Nups  
366 reported previously, the total amount of Nup205 in NPC is roughly the twice of  
367 Nup188<sup>7</sup>. Hence, it's almost impossible that there is only Nup205 or only  
368 Nup188 in IR, and it should be the combination of Nup205 and Nup188, but the  
369 exact result requires high-resolution model of IR in the future.

370

371 In summary, we solved the cryo-EM map of the *X. laevis* NPC CR in an isotropic  
372 resolution around 8 Å and obtained a more accurate and complete model at  
373 secondary structure level ([Supplementary Video 1](#)). The revealed new  
374 structural details advanced our understanding toward the detailed organization  
375 and assembly of vertebrate NPC.

376

## 377 **Methods**

### 378 **Sample preparation**

379 The sample preparation of African clawed toad *X. laevis* oocyte nucleus  
380 envelope has been described in details previously <sup>28</sup> . Briefly, ovaries were  
381 removed from narcotized mature female *X. laevis*, and stage VI oocytes were  
382 isolated, and NE were applied onto the grid in ice-cold HEPES buffer (83 mM  
383 KCl, 17 mM NaCl, 10 mM HEPES, pH 7.5). Before plunge freezing, the sample  
384 on the grid were cross-linked with 0.15% glutaraldehyde for 10 min on ice. After  
385 cross-linking process, the grid was blotted and vitrified by plunge freezing into  
386 liquid ethane by Vitrobot Mark IV (Thermo Fisher Scientific, USA) at 100%  
387 humidity, all grids were stored in liquid nitrogen before imaging.

388

389 The animal experiments were performed in the Laboratory Animal Center of  
390 Peking University in accordance with the National Institutes of Health Guide for  
391 the Care and Use of Laboratory Animals and according to guidelines approved  
392 by the Institutional Animal Care and Use Committee at Peking University.

393

### 394 **Cryo-EM data acquisition**

395 The data acquisition collection strategy of this study was basically the same  
396 with our previous reports <sup>28</sup>. Briefly, after screening in Talos Arctica 200 KV TEM  
397 (Thermo Fisher Scientific, USA), the good grids were mounted into Titan Krios  
398 300 KV TEM (Thermo Fisher Scientific, USA) for imaging. 8745 images were  
399 collected at a nominal magnification of 64,000X, resulted in a calibrated  
400 physical pixel size at the specimen level of 2.24 Å. For images at tilting angle  
401 at 0/30/45/60 degrees, the total dose was set to be 100 or 120/60/80/100 e-/Å<sup>2</sup>,  
402 the movies were recorded on a 0.5 s per frame base, and the exposure time of  
403 these collected data set were set to be 28.5 or 34.5/21.5/41 or 28.5/36 or 35 s  
404 ([Extended Data Table 1](#)). All movies were recorded by a Gatan K2 Summit DDD  
405 detector (Gatan Company, USA) under super resolution mode, equipped with  
406 a post column GIF Quantum filter, whose slit width was set to be 20 eV.  
407 SerialEM with in-house scripts was used for data collection with the defocus  
408 value set between 1.0 to 4.0 μm <sup>44,45</sup>.

409

#### 410 **SPA image processing**

411 The image processing workflow was basically the same with our previous  
412 reports <sup>28</sup>. Briefly, motion correction along with dose weighting were performed  
413 by MotionCor2 <sup>46</sup>. Particle picking was done by using RELION ver3.0 prior to  
414 CTF estimation <sup>47</sup>. Only particles with apparent feature as NPC were kept for  
415 further processing. CTF estimation was done using Gctf or goCTF or Warp on  
416 per-particle basis <sup>48-50</sup>.

417

418 The Image alignment processing of CR were done using RELION 3.0 unless  
419 stated specifically <sup>47</sup>. Prior to alignment of CR, we docked the previously  
420 reported model of the CR from human NPC (PDB entry 5A9Q) into full NPC



421 map, and segmented surrounding density using Chimera. The segmented part  
422 was used to generate a mask solely covering CR part in our map <sup>14,51</sup>. Then  
423 refinement of CR on binned 4 level using this CR mask was done. The initial  
424 reference was generated by low pass filtered the reported human NPC  
425 structure to 60 Å, and C8 symmetry was applied during refinement. The  
426 refinement of CR on binned 4 level reached a final resolution of 29 Å. Then,  
427 using refined orientations and shifts, CR particle at binned 2 level were  
428 extracted with a box size of 400 pixels. After extraction, reconstruction was  
429 done for the extracted particles to generate a mask solely covering CR region.  
430 Using similar strategy as at binned 4 level of CR particles, refinement was done  
431 and reached a final resolution of 23 Å.

432

433 Then, the alignment was done on subunit level, as no significant gain of  
434 resolution would be achieved for whole CR by decreasing binning levels. The  
435 relative coordinate of CR subunit to CR box center was determined using  
436 Chimera, then we used a modified version of block-based reconstruction script  
437 to generate a RELION star file containing orientations and updated defocus  
438 values of each subunit <sup>51,52</sup>. Then, we extract the subunit particles and first ran  
439 a reconstruct job to make sure everything was right. The model of PDB 5A9Q  
440 was used to generate a mask solely covering regions corresponding to one  
441 asymmetric unit, and refinement using this mask was done to reach a resolution  
442 of 10.7 Å for CR subunit. Extraction of binned 1 particles was done using refined  
443 shifts and orientations from refinement of binned 2 particles, with a box size of  
444 320 pixels. Like what was done for binned 2 CR subunit particles, first a  
445 reconstruction was done to obtain an initial reference and a mask solely  
446 covering one subunit was generated. Refinement at this stage reached a  
447 resolution of 9.8 Å. Next, we ran Bayesian Polishing of all particles. The output  
448 star file was separated into multiple files, each containing particles

449 corresponding to individual stage tilting angles. Then 3D classification was  
450 done for these individual tilts, using the refined map as reference. After  
451 classification, all particles corresponding to the best class in different jobs were  
452 selected and merged, then an auto refinement was done for the classified  
453 particles and reached a resolution of 8.8 Å. Then the output star file and  
454 corresponding map were subjected to CryoSPARC for final refinement using its  
455 local refinement tool and resulted in a final resolution of 8.7 Å<sup>53</sup>. Similarly, a  
456 mask covering the most rigid part of CR subunit was created, also subjected to  
457 CryoSPARC for local refinement using the same particles data set and reached  
458 a final resolution of 8 Å for CR core region<sup>53</sup>. A similar strategy was applied to  
459 CR Nup358 region and reached a final resolution of 8.9 Å. The validation of  
460 map and model quality of this research was done using 3D-FSC and Phenix  
461<sup>30,54</sup> ([Extended Data Fig.2](#)).

462

### 463 **Modeling of NPC CR**

464 The full version of AlphaFold2 was installed as instructed with all database  
465 downloaded<sup>29</sup>. All the structures of NPC CR Nups from *X. laevis* or *X. tropicalis*  
466 (Nup160 and Nup96), were predicted by AlphaFOLD2 using the recommended  
467 parameters. Briefly, the value of Max\_template\_hits was set to 20,  
468 Relax\_energy\_tolerance was set to 2.39, Relax\_stiffness was set to 10,  
469 Relax\_max\_outer\_iterations was set to 20. For each Nup, a total of 5 relaxed  
470 structures were predicted, and the prediction with the highest confidence was  
471 selected as the starting model for the next refinement.

472

473 Then we performed stepwise MDFF simulations to refine each Nup model  
474 according to the corresponding local density in CR subunit. A timestep of 1 fs  
475 was used throughout the simulation. Langevin dynamics were adopted at a  
476 temperature of 310 K. The equilibration step for energy minimization was

477 performed on the initial model for 1000 steps before the refinement run. The  
478 refinement runs were performed for 3000 ps, which corresponds to 3,000,000  
479 simulation steps, and the gridForceScale values were gradually increased from  
480 0.3 to 0.7 during the refinement. All simulations were performed using  
481 CHARMM36m forcefields <sup>55</sup>. Electrostatic calculations were treated with  
482 particle mesh Ewald (PME). A cutoff of 12 Å was chosen for short-range van  
483 der Waals interactions. NAMD <sup>56</sup> was used as the MD engine throughout all  
484 simulations.

485

486 All the CR components were assembled in COOT <sup>57</sup> for manually adjustment  
487 according to the overall density map of CR subunit. Then the whole model of  
488 CR subunit was refined using PHENIX.real\_space\_refine <sup>58</sup>. Data collection  
489 statistics and refinement statistics are given in [Extended Data Table 1](#). All  
490 figures in this study were generated by PyMol, Chimera and ChimeraX <sup>51,59</sup>.

491

## 492 **Data Availability**

493 The Electron Microscopy Database (EMD) accession codes of the CR subunit  
494 region, CR core region and CR Nup358 region are EMD-32056, EMD-32060,  
495 EMD-32061, respectively. The Protein Data Bank (PDB) accession code of the  
496 model of the CR subunit is 7VOP.

## 497 **ACKNOWLEDGEMENTS**

498 We thank all other members of the Fei Sun and Chuanmao Zhang laboratories  
499 for their help. We would also like to thank the Center for Biological Imaging  
500 (CBI), Institute of Biophysics, Chinese Academy of Science for cryo-EM work,  
501 and Boling Zhu, Xujing Li, Gang Ji, Jiashu Xu and Guoliang Yin for their help  
502 with cryo-EM data collection; the Facilities Cores at National Center for Protein  
503 Sciences and the cryo-EM and TEM platforms at the College of Life Sciences  
504 of Peking University for cryo-electron microscopy and TEM; and Ning Gao,

505 Zhenxi Guo, Guopeng Wang, Yingchun Hu, Xia Pei and Bo Shao for their help  
506 with cryo-EM and TEM experiments.

507 This work was equally supported by grants from Ministry of Science and  
508 Technology of China (2017YFA0504700 to FS and 2016YFA0500201 to CMZ),  
509 the Strategic Priority Research Program of the Chinese Academy of Sciences  
510 (XDB 37040102 to FS), and National Natural Science Foundation of China  
511 (31830020 to FS, 31520103906 to CMZ). This work was also supported by  
512 grants from the National Science Fund for Distinguished Young Scholars  
513 (31925026 to FS), National Natural Science Foundation of China (31430051 to  
514 CMZ) and National Key Research and Development Program of China  
515 (2016YFA0100501 to CMZ and 2018YFA0901102 to YZ).

## 516 **AUTHOR CONTRIBUTIONS**

517 F. S. and C. Z. conceived the project and designed the experiments. L. T., H. R.  
518 and X. H. performed cryo-EM experiments. L. T. and Y. Z. performed cryo-EM  
519 data processing. H. R. and L. T. participated in the preparation and screening  
520 of cryo-EM samples. Y. Z. performed the modeling and simulation-based  
521 refinement. L. T. and Y. Z. analyzed the data and wrote the manuscript, which  
522 was substantially revised by F. S. and C. Z.

523

## 524 **Competing Interests**

525 The authors declare no competing interests.

526

527 **Reference**

- 528 1 Lin, D. H. & Hoelz, A. The Structure of the Nuclear Pore Complex (An Update). *Annu Rev*  
529 *Biochem* **88**, 725-783, doi:10.1146/annurev-biochem-062917-011901 (2019).
- 530 2 Floch, A. G., Palancade, B. & Doye, V. Fifty Years of Nuclear Pores and Nucleocytoplasmic  
531 Transport Studies: Multiple Tools Revealing Complex Rules. *Method Cell Biol* **122**, 1-40,  
532 doi:10.1016/B978-0-12-417160-2.00001-1 (2014).
- 533 3 Hampoelz, B., Andres-Pons, A., Kastritis, P. & Beck, M. Structure and Assembly of the  
534 Nuclear Pore Complex. *Annu Rev Biophys* **48**, 515-536, doi:10.1146/annurev-biophys-  
535 052118-115308 (2019).
- 536 4 Hoelz, A., Debler, E. W. & Blobel, G. The structure of the nuclear pore complex. *Annu Rev*  
537 *Biochem* **80**, 613-643, doi:10.1146/annurev-biochem-060109-151030 (2011).
- 538 5 Rout, M. P. *et al.* The yeast nuclear pore complex: composition, architecture, and transport  
539 mechanism. *J Cell Biol* **148**, 635-651, doi:10.1083/jcb.148.4.635 (2000).
- 540 6 Cronshaw, J. M., Krutchinsky, A. N., Zhang, W., Chait, B. T. & Matunis, M. J. Proteomic  
541 analysis of the mammalian nuclear pore complex. *J Cell Biol* **158**, 915-927,  
542 doi:10.1083/jcb.200206106 (2002).
- 543 7 Ori, A. *et al.* Cell type-specific nuclear pores: a case in point for context-dependent  
544 stoichiometry of molecular machines. *Mol Syst Biol* **9**, 648, doi:10.1038/msb.2013.4 (2013).
- 545 8 Hinshaw, J. E., Carragher, B. O. & Milligan, R. A. Architecture and design of the nuclear  
546 pore complex. *Cell* **69**, 1133-1141, doi:10.1016/0092-8674(92)90635-p (1992).
- 547 9 Akey, C. W. & Radermacher, M. Architecture of the *Xenopus* nuclear pore complex  
548 revealed by three-dimensional cryo-electron microscopy. *J Cell Biol* **122**, 1-19,  
549 doi:10.1083/jcb.122.1.1 (1993).
- 550 10 Beck, M. *et al.* Nuclear pore complex structure and dynamics revealed by cryoelectron  
551 tomography. *Science* **306**, 1387-1390, doi:10.1126/science.1104808 (2004).
- 552 11 Beck, M., Lucic, V., Forster, F., Baumeister, W. & Medalia, O. Snapshots of nuclear pore  
553 complexes in action captured by cryo-electron tomography. *Nature* **449**, 611-615,  
554 doi:10.1038/nature06170 (2007).
- 555 12 Maimon, T., Elad, N., Dahan, I. & Medalia, O. The human nuclear pore complex as revealed  
556 by cryo-electron tomography. *Structure* **20**, 998-1006, doi:10.1016/j.str.2012.03.025  
557 (2012).
- 558 13 Bui, K. H. *et al.* Integrated structural analysis of the human nuclear pore complex scaffold.  
559 *Cell* **155**, 1233-1243, doi:10.1016/j.cell.2013.10.055 (2013).
- 560 14 von Appen, A. *et al.* In situ structural analysis of the human nuclear pore complex. *Nature*  
561 **526**, 140-143, doi:10.1038/nature15381 (2015).
- 562 15 Kim, S. J. *et al.* Integrative structure and functional anatomy of a nuclear pore complex.  
563 *Nature* **555**, 475-482, doi:10.1038/nature26003 (2018).
- 564 16 Mosalaganti, S. *et al.* In situ architecture of the algal nuclear pore complex. *Nat Commun*  
565 **9**, 2361, doi:10.1038/s41467-018-04739-y (2018).
- 566 17 Allegretti, M. *et al.* In-cell architecture of the nuclear pore and snapshots of its turnover.  
567 *Nature* **586**, 796-800, doi:10.1038/s41586-020-2670-5 (2020).
- 568 18 Zhang, Y. *et al.* Molecular architecture of the luminal ring of the *Xenopus laevis* nuclear

- 569 pore complex. *Cell Res* **30**, 532-540, doi:10.1038/s41422-020-0320-y (2020).
- 570 19 Zimmerli, C. E. *et al.* Nuclear pores constrict upon energy depletion.  
571 doi:10.1101/2020.07.30.228585 (2020).
- 572 20 Lin, D. H. *et al.* Architecture of the symmetric core of the nuclear pore. *Science* **352**,  
573 aaf1015, doi:10.1126/science.aaf1015 (2016).
- 574 21 Kelley, K., Knockenhauer, K. E., Kabachinski, G. & Schwartz, T. U. Atomic structure of the Y  
575 complex of the nuclear pore. *Nat Struct Mol Biol* **22**, 425-431, doi:10.1038/nsmb.2998  
576 (2015).
- 577 22 Hsia, K. C., Stavropoulos, P., Blobel, G. & Hoelz, A. Architecture of a coat for the nuclear  
578 pore membrane. *Cell* **131**, 1313-1326, doi:10.1016/j.cell.2007.11.038 (2007).
- 579 23 Seo, H. S. *et al.* Structural and functional analysis of Nup120 suggests ring formation of  
580 the Nup84 complex. *P Natl Acad Sci USA* **106**, 14281-14286,  
581 doi:10.1073/pnas.0907453106 (2009).
- 582 24 Kampmann, M. & Blobel, G. Three-dimensional structure and flexibility of a membrane-  
583 coating module of the nuclear pore complex. *Nat Struct Mol Biol* **16**, 782-788,  
584 doi:10.1038/nsmb.1618 (2009).
- 585 25 Bernad, R., van der Velde, H., Fornerod, M. & Pickersgill, H. Nup358/RanBP2 attaches to  
586 the nuclear pore complex via association with Nup88 and Nup214/CAN and plays a  
587 supporting role in CRM1-mediated nuclear protein export. *Mol Cell Biol* **24**, 2373-2384,  
588 doi:10.1128/MCB.24.6.2373-2384.2004 (2004).
- 589 26 Hutten, S. & Kehlenbach, R. H. Nup214 is required for CRM1-dependent nuclear protein  
590 export in vivo. *Mol Cell Biol* **26**, 6772-6785, doi:10.1128/MCB.00342-06 (2006).
- 591 27 Huang, G. *et al.* Structure of the cytoplasmic ring of the *Xenopus laevis* nuclear pore  
592 complex by cryo-electron microscopy single particle analysis. *Cell Res* **30**, 520-531,  
593 doi:10.1038/s41422-020-0319-4 (2020).
- 594 28 Tai, L. *et al.* 8 Å structure of the cytoplasmic ring of the *Xenopus laevis* nuclear pore  
595 complex obtained by cryo-EM and AI. (*In submission*).
- 596 29 Jumper, J. *et al.* Highly accurate protein structure prediction with AlphaFold. *Nature* **596**,  
597 583-589, doi:10.1038/s41586-021-03819-2 (2021).
- 598 30 Tan, Y. Z. *et al.* Addressing preferred specimen orientation in single-particle cryo-EM  
599 through tilting. *Nat Methods* **14**, 793-796, doi:10.1038/nmeth.4347 (2017).
- 600 31 Jumper, J. *et al.* Highly accurate protein structure prediction with AlphaFold. *Nature*,  
601 doi:10.1038/s41586-021-03819-2 (2021).
- 602 32 Debler, E. W. *et al.* A fence-like coat for the nuclear pore membrane. *Mol Cell* **32**, 815-  
603 826, doi:10.1016/j.molcel.2008.12.001 (2008).
- 604 33 Brohawn, S. G., Leksa, N. C., Spear, E. D., Rajashankar, K. R. & Schwartz, T. U. Structural  
605 evidence for common ancestry of the nuclear pore complex and vesicle coats. *Science*  
606 **322**, 1369-1373, doi:10.1126/science.1165886 (2008).
- 607 34 Kosinski, J. *et al.* Molecular architecture of the inner ring scaffold of the human nuclear  
608 pore complex. *Science* **352**, 363-365, doi:10.1126/science.aaf0643 (2016).
- 609 35 Wu, J., Matunis, M. J., Kraemer, D., Blobel, G. & Coutavas, E. Nup358, a cytoplasmically  
610 exposed nucleoporin with peptide repeats, Ran-GTP binding sites, zinc fingers, a  
611 cyclophilin A homologous domain, and a leucine-rich region. *J Biol Chem* **270**, 14209-  
612 14213, doi:10.1074/jbc.270.23.14209 (1995).

- 613 36 Lin, D. H., Zimmermann, S., Stuwe, T., Stuwe, E. & Hoelz, A. Structural and functional  
614 analysis of the C-terminal domain of Nup358/RanBP2. *Journal of molecular biology* **425**,  
615 1318-1329, doi:10.1016/j.jmb.2013.01.021 (2013).
- 616 37 Kassube, S. A. *et al.* Crystal structure of the N-terminal domain of Nup358/RanBP2. *Journal*  
617 *of molecular biology* **423**, 752-765, doi:10.1016/j.jmb.2012.08.026 (2012).
- 618 38 Fernandez-Martinez, J. *et al.* Structure and Function of the Nuclear Pore Complex  
619 Cytoplasmic mRNA Export Platform. *Cell* **167**, 1215-1228 e1225,  
620 doi:10.1016/j.cell.2016.10.028 (2016).
- 621 39 Gaik, M. *et al.* Structural basis for assembly and function of the Nup82 complex in the  
622 nuclear pore scaffold. *J Cell Biol* **208**, 283-297, doi:10.1083/jcb.201411003 (2015).
- 623 40 Napetschnig, J., Blobel, G. & Hoelz, A. Crystal structure of the N-terminal domain of the  
624 human protooncogene Nup214/CAN. *Proc Natl Acad Sci U S A* **104**, 1783-1788,  
625 doi:10.1073/pnas.0610828104 (2007).
- 626 41 Napetschnig, J. *et al.* Structural and functional analysis of the interaction between the  
627 nucleoporin Nup214 and the DEAD-box helicase Ddx19. *Proc Natl Acad Sci U S A* **106**,  
628 3089-3094, doi:10.1073/pnas.0813267106 (2009).
- 629 42 Roloff, S., Spillner, C. & Kehlenbach, R. H. Several phenylalanine-glycine motives in the  
630 nucleoporin Nup214 are essential for binding of the nuclear export receptor CRM1. *J Biol*  
631 *Chem* **288**, 3952-3963, doi:10.1074/jbc.M112.433243 (2013).
- 632 43 Port, S. A. *et al.* Structural and Functional Characterization of CRM1-Nup214 Interactions  
633 Reveals Multiple FG-Binding Sites Involved in Nuclear Export. *Cell Rep* **13**, 690-702,  
634 doi:10.1016/j.celrep.2015.09.042 (2015).
- 635 44 Mastronarde, D. N. Automated electron microscope tomography using robust prediction  
636 of specimen movements. *J Struct Biol* **152**, 36-51, doi:10.1016/j.jsb.2005.07.007 (2005).
- 637 45 Wu, C., Huang, X., Cheng, J., Zhu, D. & Zhang, X. High-quality, high-throughput cryo-  
638 electron microscopy data collection via beam tilt and astigmatism-free beam-image shift.  
639 *J Struct Biol* **208**, 107396, doi:10.1016/j.jsb.2019.09.013 (2019).
- 640 46 Zheng, S. Q. *et al.* MotionCor2: anisotropic correction of beam-induced motion for  
641 improved cryo-electron microscopy. *Nat Methods* **14**, 331-332, doi:10.1038/nmeth.4193  
642 (2017).
- 643 47 Zivanov, J. *et al.* New tools for automated high-resolution cryo-EM structure  
644 determination in RELION-3. *Elife* **7**, doi:10.7554/eLife.42166 (2018).
- 645 48 Zhang, K. Gctf: Real-time CTF determination and correction. *J Struct Biol* **193**, 1-12,  
646 doi:10.1016/j.jsb.2015.11.003 (2016).
- 647 49 Su, M. goCTF: Geometrically optimized CTF determination for single-particle cryo-EM. *J*  
648 *Struct Biol* **205**, 22-29, doi:10.1016/j.jsb.2018.11.012 (2019).
- 649 50 Tegunov, D. & Cramer, P. Real-time cryo-electron microscopy data preprocessing with  
650 Warp. *Nat Methods* **16**, 1146-1152, doi:10.1038/s41592-019-0580-y (2019).
- 651 51 Pettersen, E. F. *et al.* UCSF Chimera--a visualization system for exploratory research and  
652 analysis. *J Comput Chem* **25**, 1605-1612, doi:10.1002/jcc.20084 (2004).
- 653 52 Zhu, D. *et al.* Pushing the resolution limit by correcting the Ewald sphere effect in single-  
654 particle Cryo-EM reconstructions. *Nat Commun* **9**, 1552, doi:10.1038/s41467-018-  
655 04051-9 (2018).
- 656 53 Punjani, A., Rubinstein, J. L., Fleet, D. J. & Brubaker, M. A. cryoSPARC: algorithms for rapid

657           unsupervised cryo-EM structure determination. *Nat Methods* **14**, 290-296,  
658           doi:10.1038/nmeth.4169 (2017).

659    54       Afonine, P. V. *et al.* Towards automated crystallographic structure refinement with  
660           phenix.refine. *Acta Crystallogr D Biol Crystallogr* **68**, 352-367,  
661           doi:10.1107/S0907444912001308 (2012).

662    55       Huang, J. *et al.* CHARMM36m: an improved force field for folded and intrinsically  
663           disordered proteins. *Nat Methods* **14**, 71-73, doi:10.1038/nmeth.4067 (2017).

664    56       Phillips, J. C. *et al.* Scalable molecular dynamics with NAMD. *J Comput Chem* **26**, 1781-  
665           1802, doi:10.1002/jcc.20289 (2005).

666    57       Emsley, P., Lohkamp, B., Scott, W. G. & Cowtan, K. Features and development of Coot.  
667           *Acta Crystallogr D Biol Crystallogr* **66**, 486-501, doi:10.1107/S0907444910007493 (2010).

668    58       Liebschner, D. *et al.* Macromolecular structure determination using X-rays, neutrons and  
669           electrons: recent developments in Phenix. *Acta Crystallogr D Struct Biol* **75**, 861-877,  
670           doi:10.1107/S2059798319011471 (2019).

671    59       Goddard, T. D. *et al.* UCSF ChimeraX: Meeting modern challenges in visualization and  
672           analysis. *Protein Sci* **27**, 14-25, doi:10.1002/pro.3235 (2018).

673

674

675

676



677 **Figures**

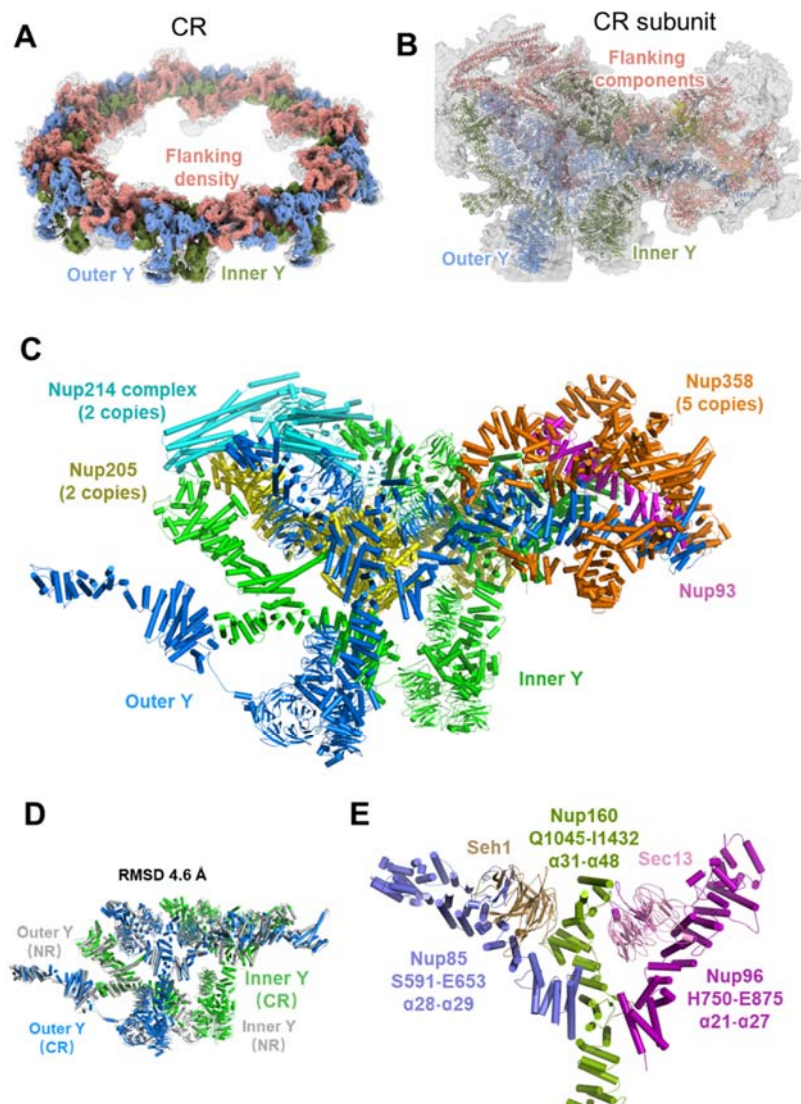

678

679

680 **Figure 1. The more complete pseudoatomic model of the CR from the *X.***

681 ***laevis* oocyte NPC. (A)** Overall view of the *X. laevis* NPC CR structure,

682 displaying the inner and outer Y complexes in each asymmetric unit, as well as

683 the densities other than the Y complexes. The inner Y complexes are colored

684 in olive, the outer Y complexes are in cornflower blue, and the extra densities

685 are in coral. (B) Model-map overlay of the NPC CR subunit. The map density

686 is displayed in grey with transparency. Models of the inner Y complex, outer Y

687 complex and extra densities are in the same colors as in (A). (C) Model display

688 of Nups corresponding to two Y complexes, two Nup214 complexes, two

689 Nup205 and five Nup358 in the CR subunit, coloured differently. (D) RMSD

690 between two Y complexes within CR or NR subunit. (E) Y complex hub region

691 in CR asymmetric unit, showing interactions of C terminals of Nup85, Nup160,

692 Nup96 and Seh1, Sec13.

693

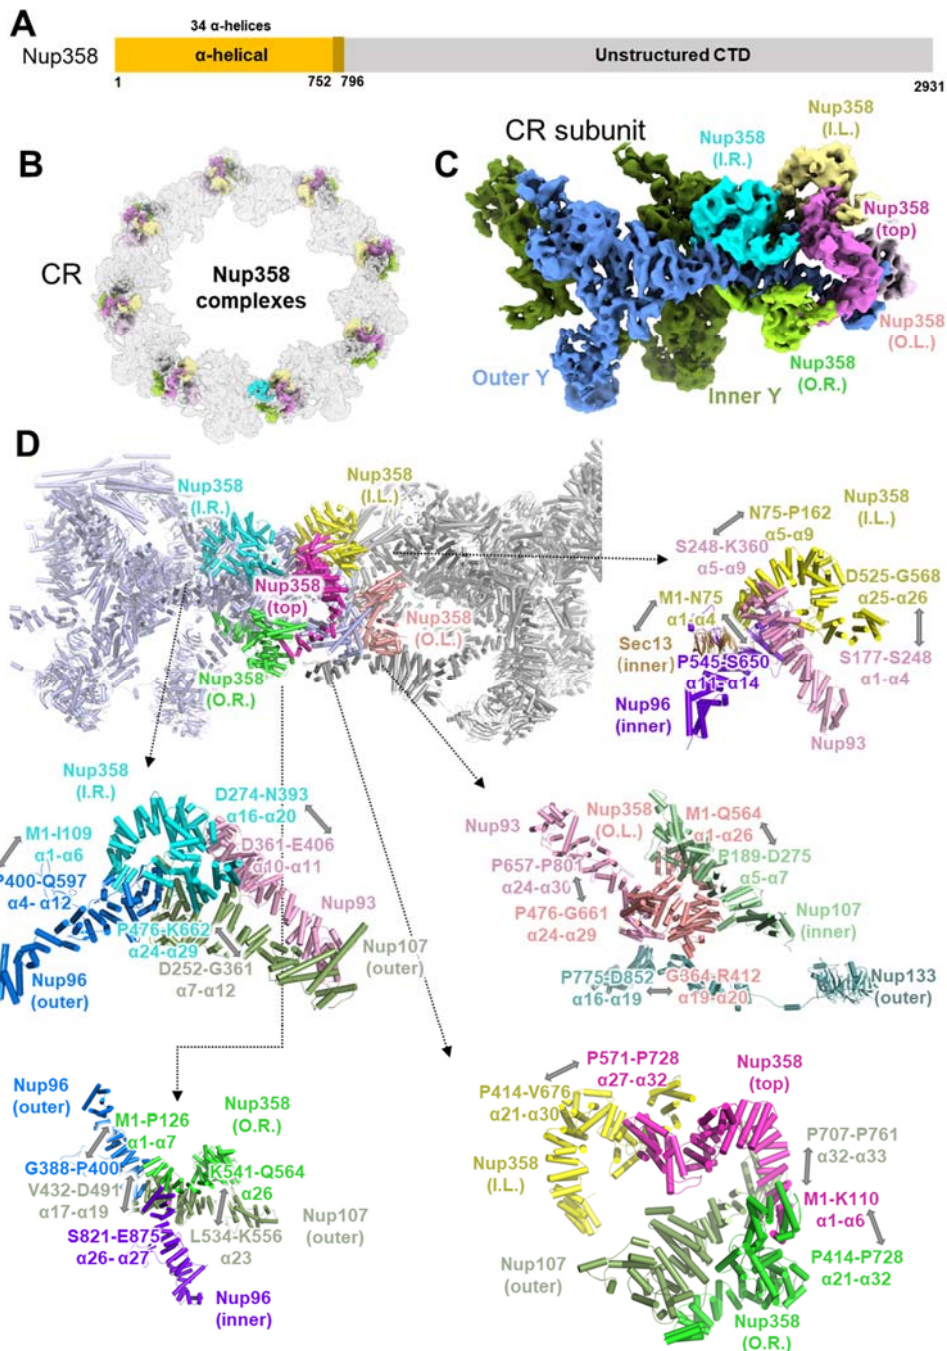

694

695 **Figure 2. The structures and interaction details of 5 copies of Nup358 in**  
 696 **each CR subunit. (A) Domain assignment of modeled part of Nup358. (B)**  
 697 **Location of 40 copies Nup358 in CR, while the 5 copies of Nup358 in each**  
 698 **subunit were colored differently. (C) Location of 5 copies of Nup358 in CR**  
 699 **subunit, colored differently. (D) Interactions of 5 copies of Nup358 with**  
 700 **surrounding Nups.**

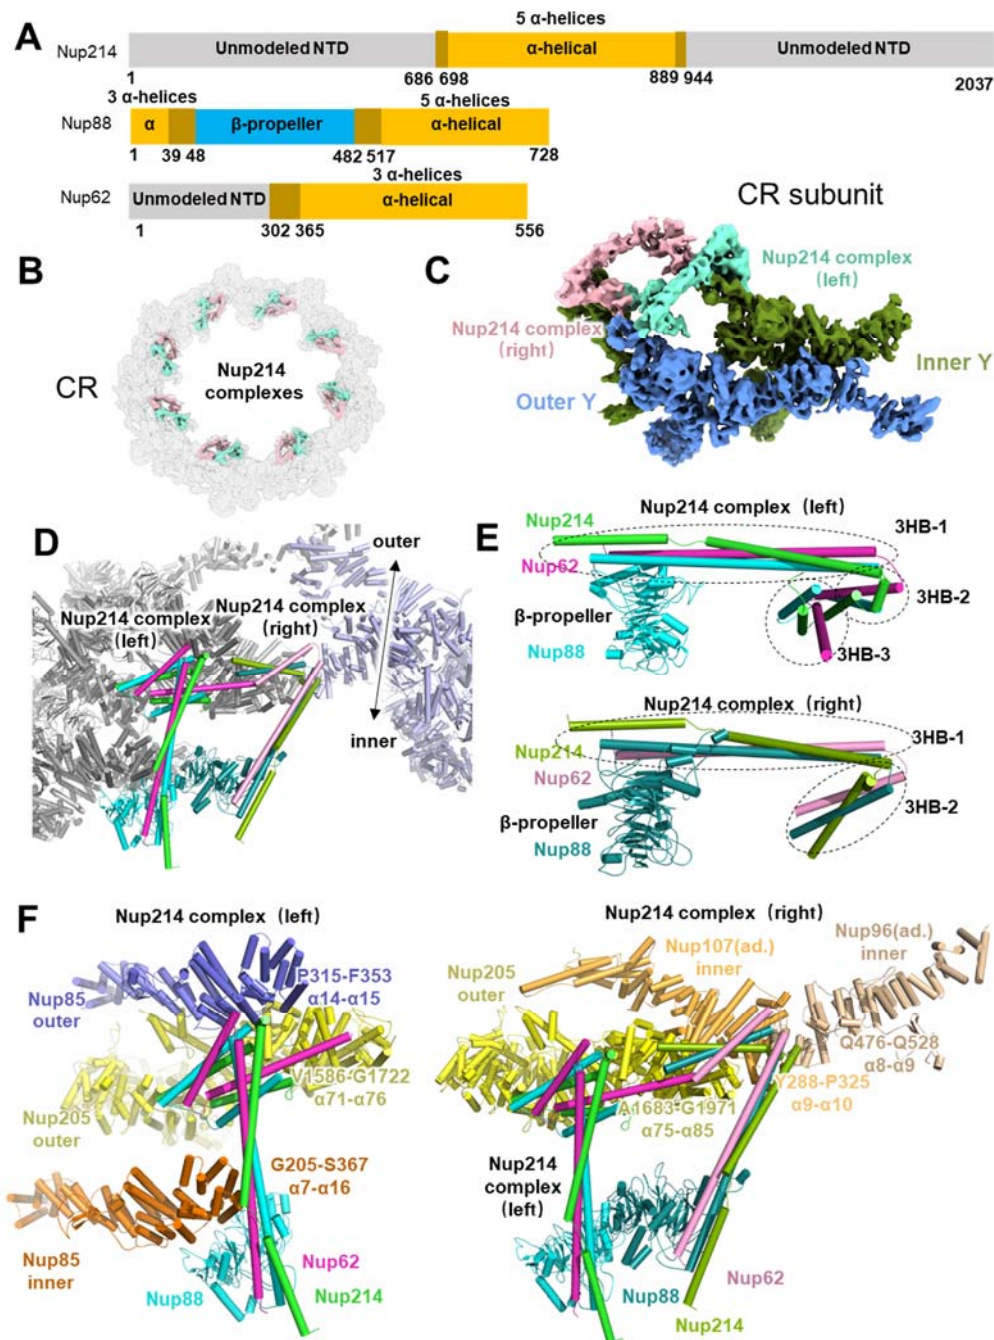

701

702

703

704

705

706

707

708

709

710

711

**Figure 3. The structures and interaction details of 2 copies of Nup214 complex in each CR subunit.** (A) Domain assignment of modeled part of Nup214, Nup88 and Nup62. (B) Location of 16 copies Nup214 complex in CR, Nup214 complex in each subunit were colored differently. (C) Location of 2 copies of Nup214 complex in CR subunit. The left Nup214 complex was colored in chartreuse, right Nup214 complex was in light pink. (D) Model of left and right Nup214 complex attached to two CR subunits. (E) Domain display of left and right Nup214 complexes. (F) Interaction sites of left and right Nup214 complexes.

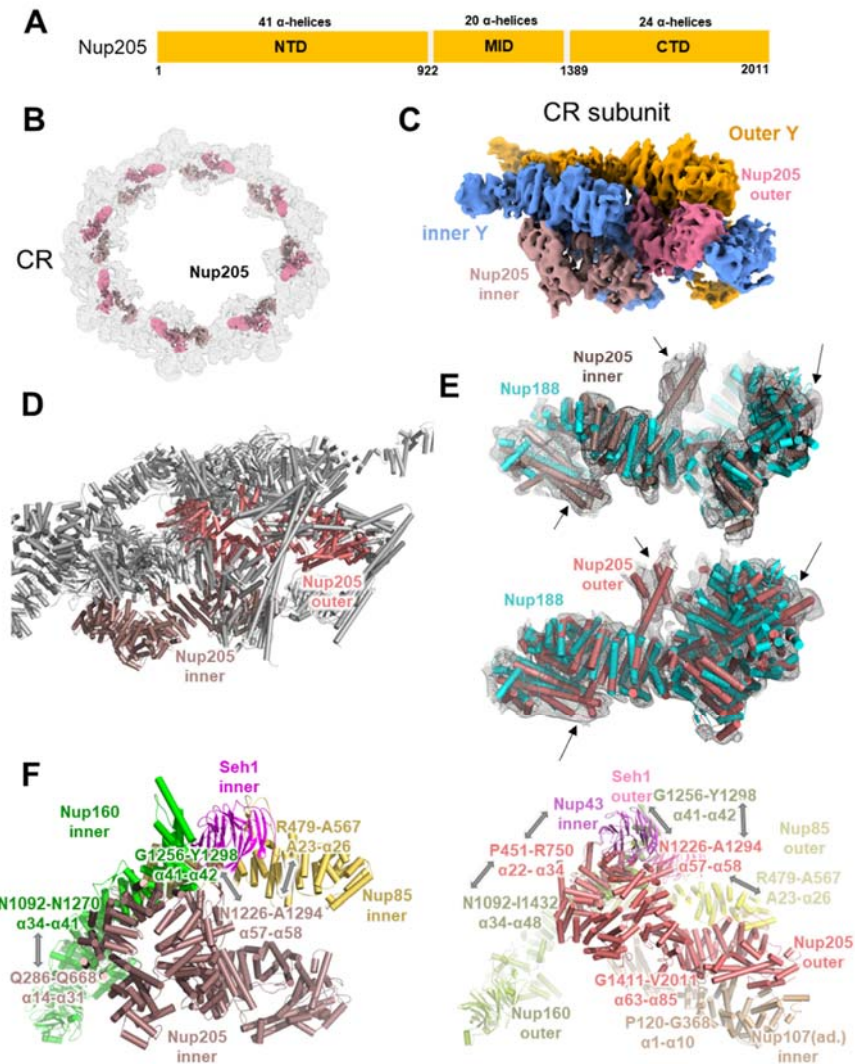

712

713 **Figure 4. The structures and interaction details of inner and outer Nup205**  
 714 **in CR subunit. (A)** Domain assignment of Nup205. **(B)** Location of 16 copies  
 715 Nup205 in CR, showing relative positions of inner and outer Nup205, Nup205  
 716 within each subunit were colored differently. **(C)** Location of 2 copies Nup205  
 717 in CR subunit, inner Nup205 was colored in salmon, outer Nup205 was in pale  
 718 violet red. **(D)** Model of inner and outer Nup205 attached to CR subunit. **(E)**  
 719 Model overlay of Nup205 and Nup188 onto local densities, showing major  
 720 differences. **(F)** Interaction sites of inner and outer Nup205 to surrounding Nups.  
 721 a.d., adjacent subunit.

722

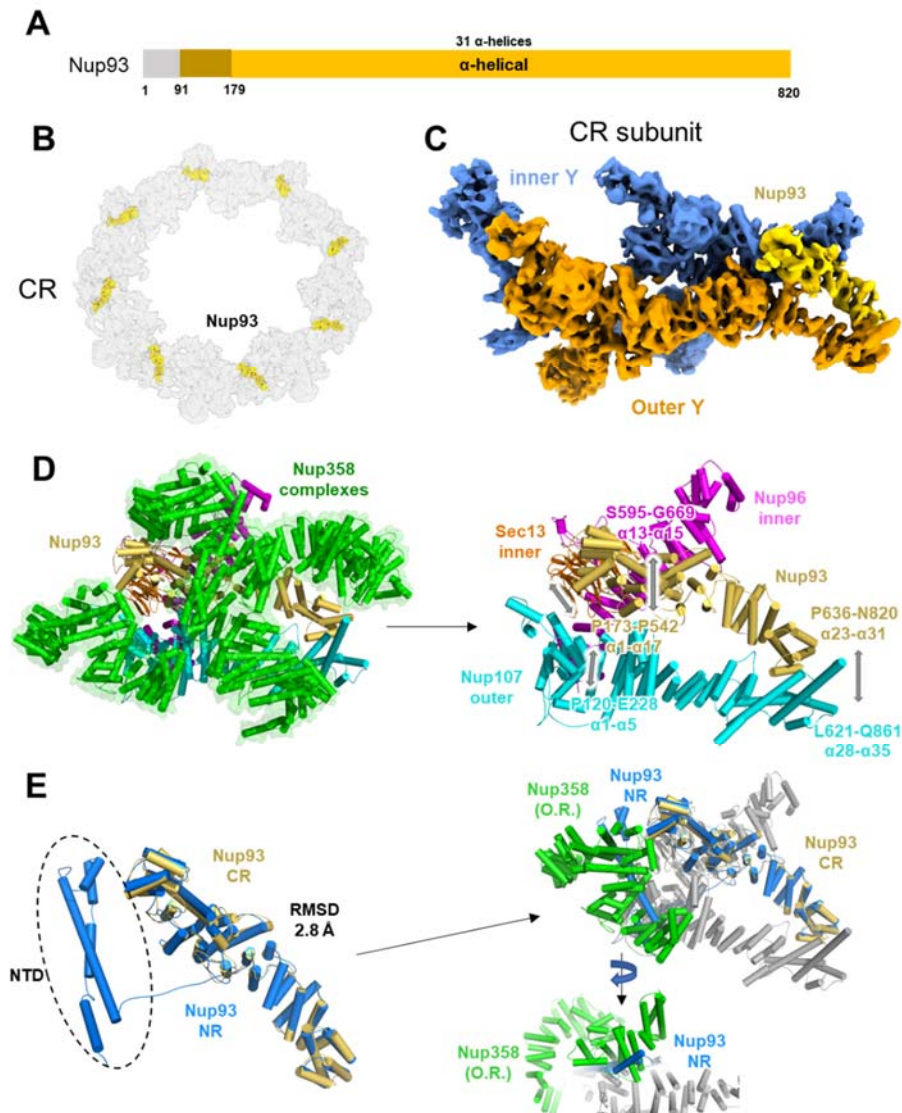

723

724 **Figure 5. Nup93 acts as a bridge to connect the stems of the inner and**  
725 **outer Y complexes in CR. (A) Domain assignment of modeled part of Nup93.**  
726 **(B) Location of 8 copies Nup93 in CR, colored in gold. (C) Location of Nup93**  
727 **in CR subunit. (D) Interaction sites of Nup93 with surrounding Nups. (E) Model**  
728 **comparison between Nup93 in CR and NR, showing spatial conflicts between**  
729 **outer right Nup358 with NTD of Nup93 from NR.**
